# Supplementary material for: Optimized Stem Cell Detection Using the DyeCycle-Triggered Side Population Phenotype
Source: PubMed Central journal article supplement (PMC4699066; doi:10.1155/2016/1652389), 2015-12-20

**A**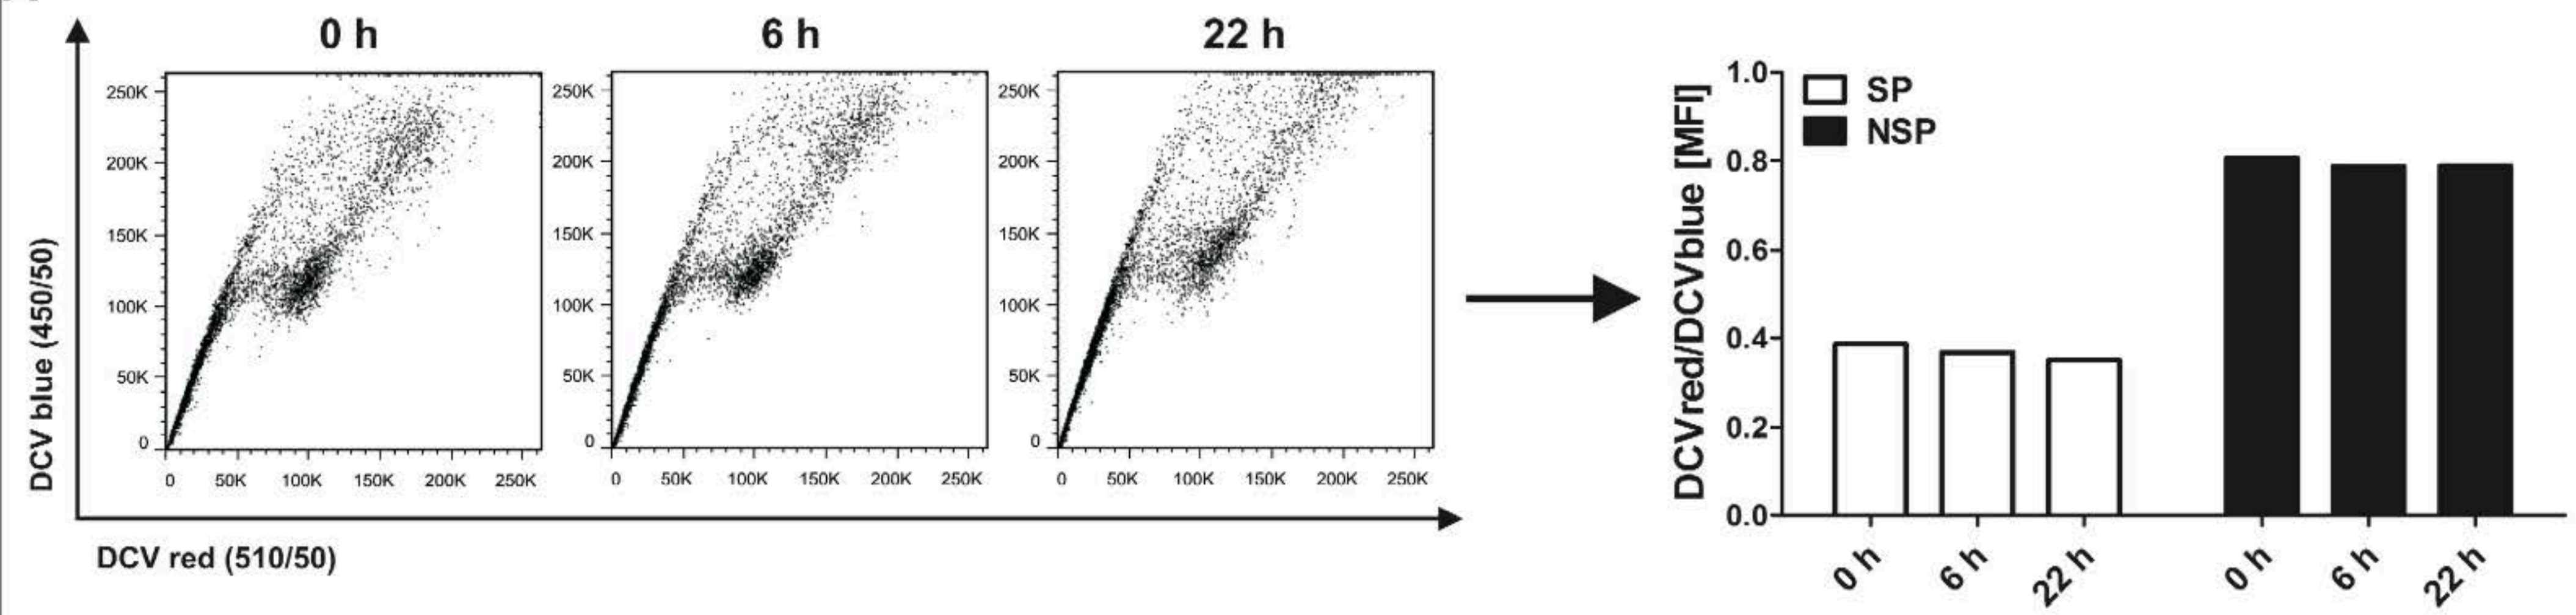**B**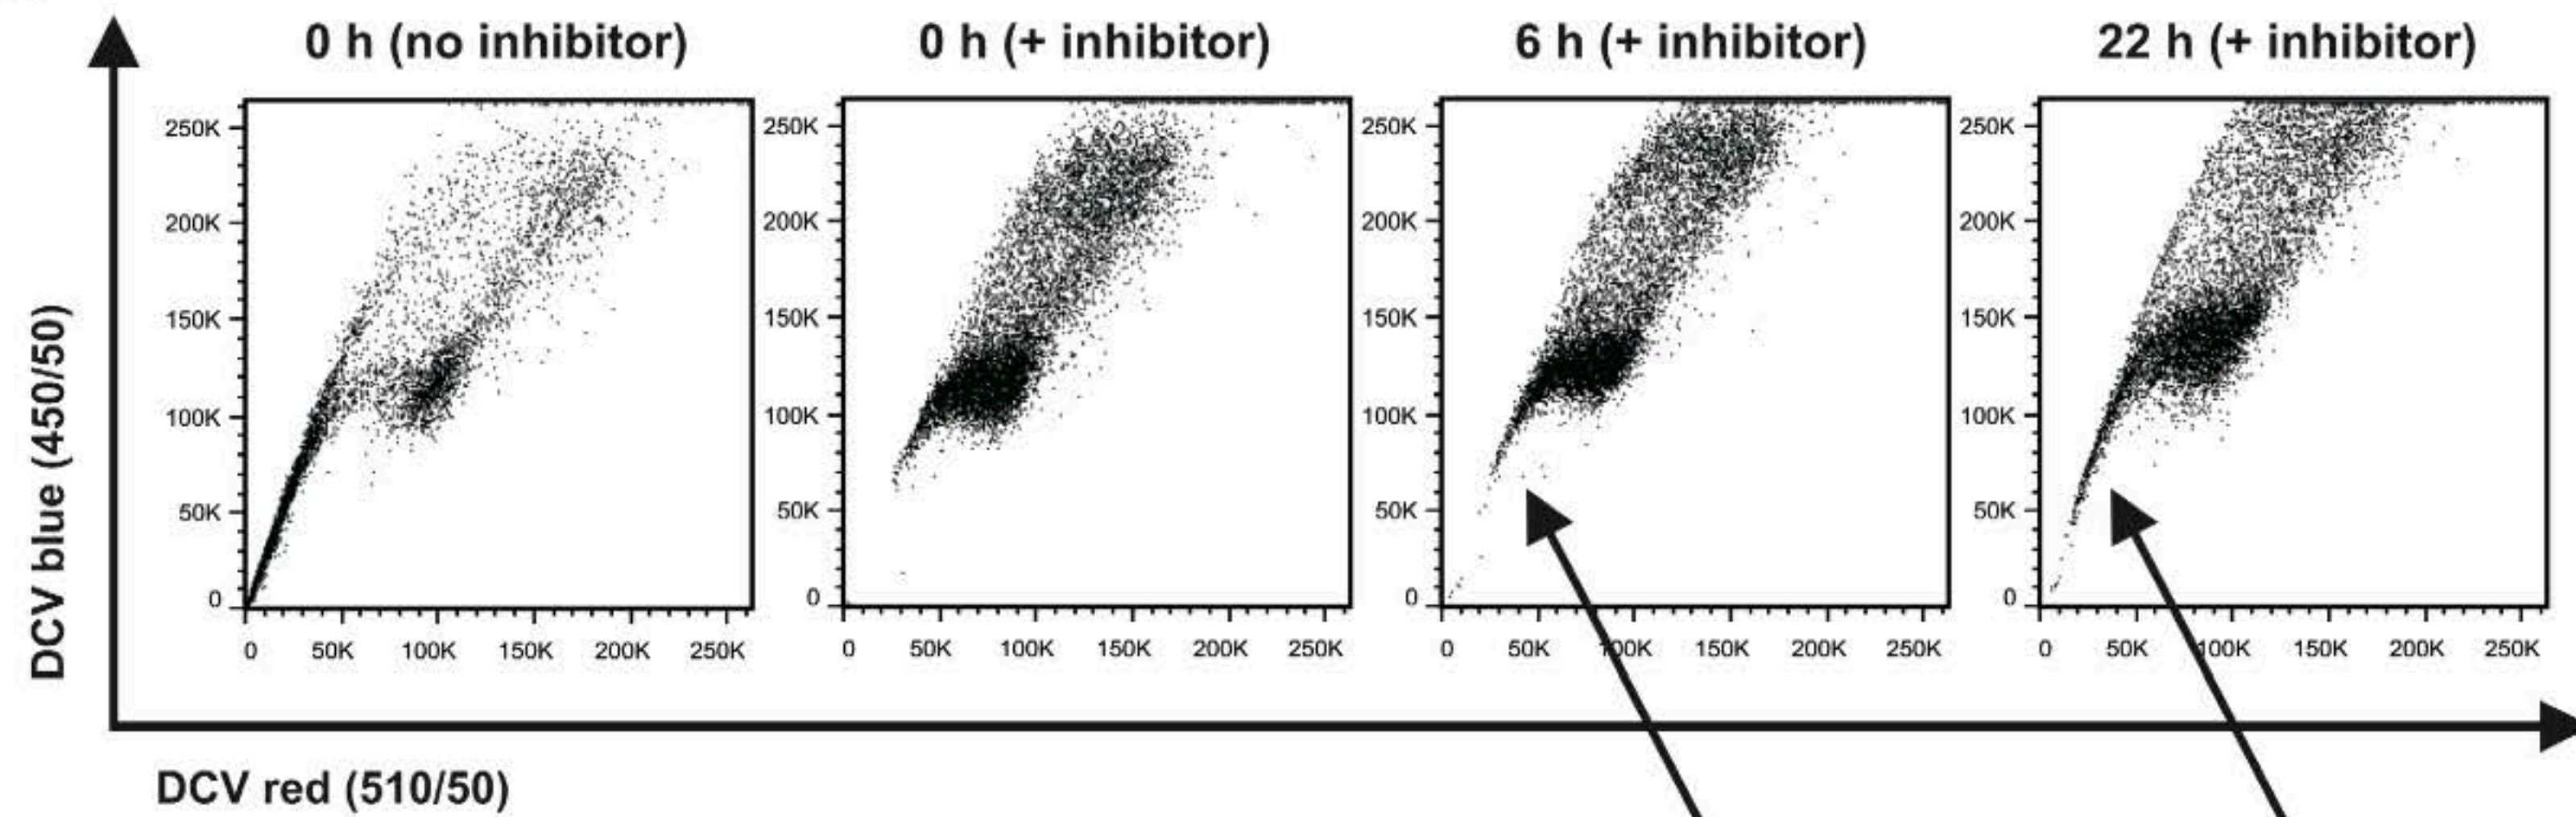

Time-dependent re-appearance of SP cells due to lack of active doses of inhibitor after washing

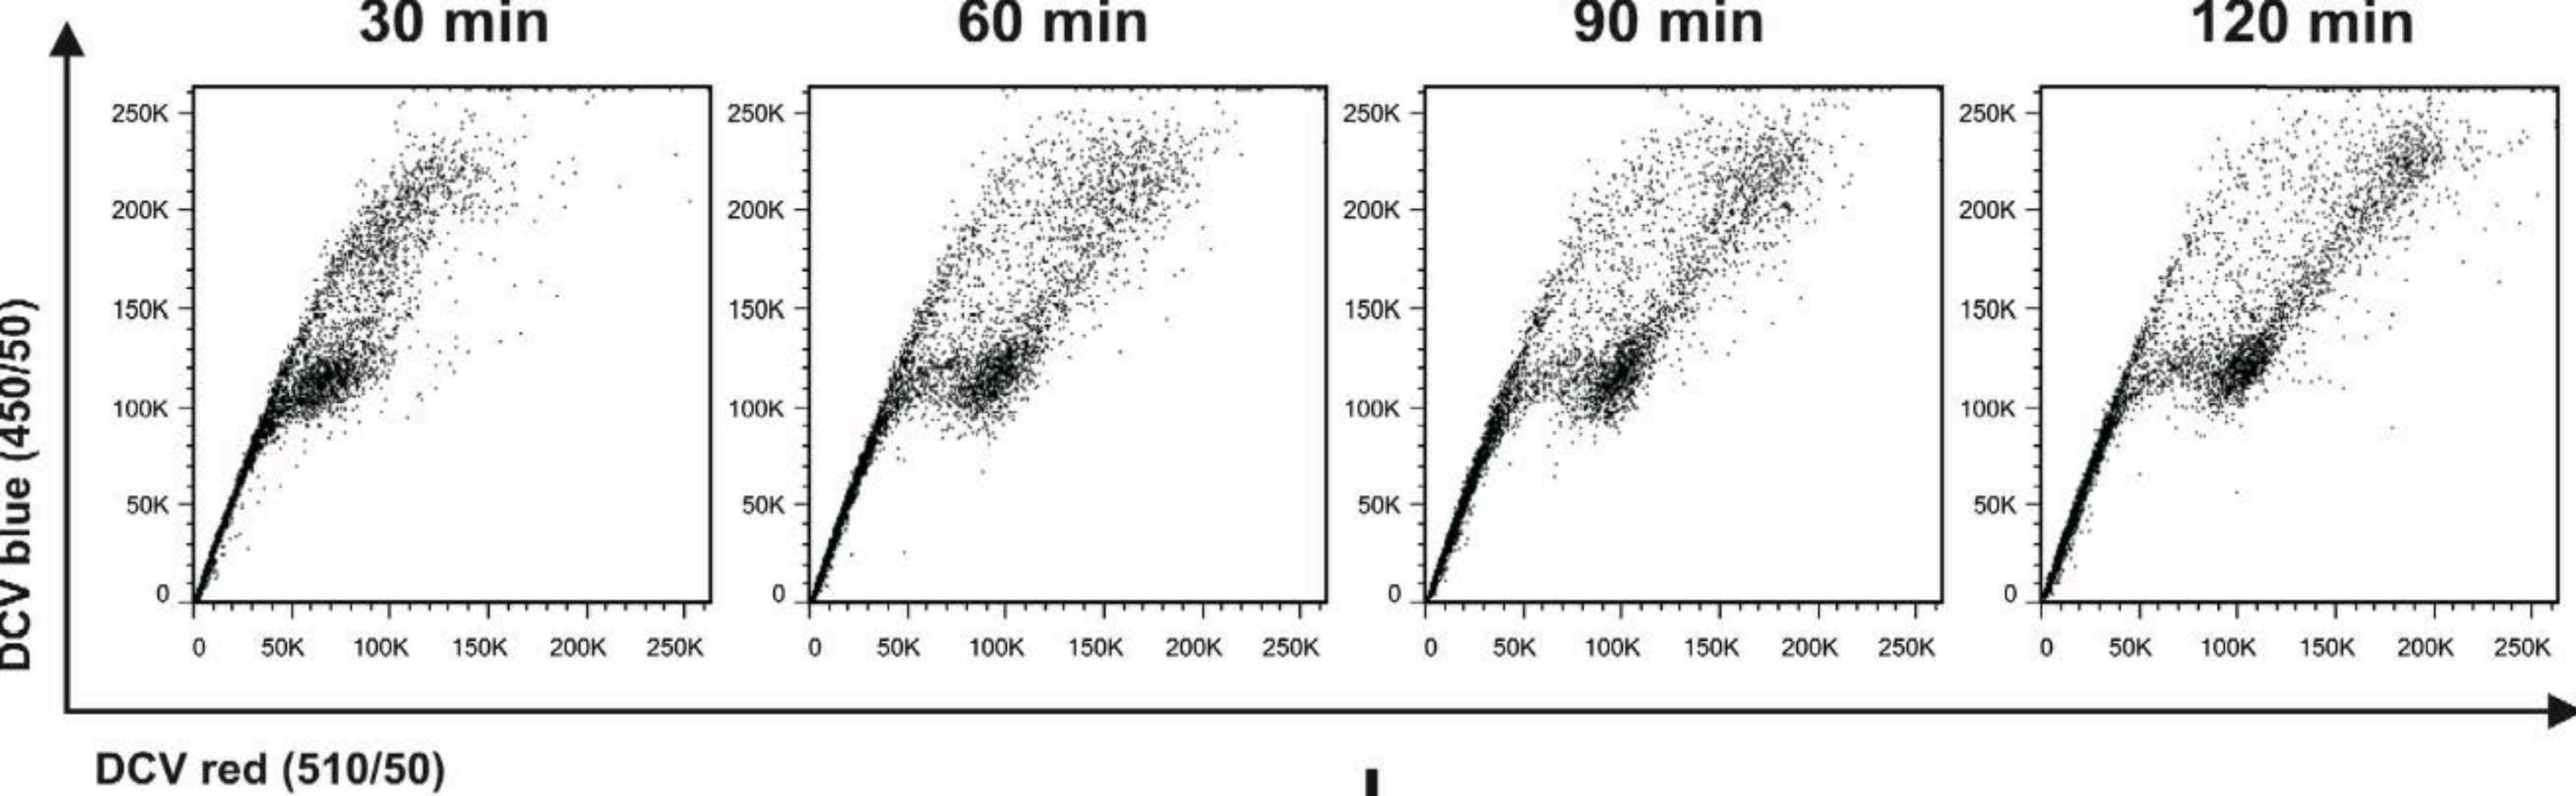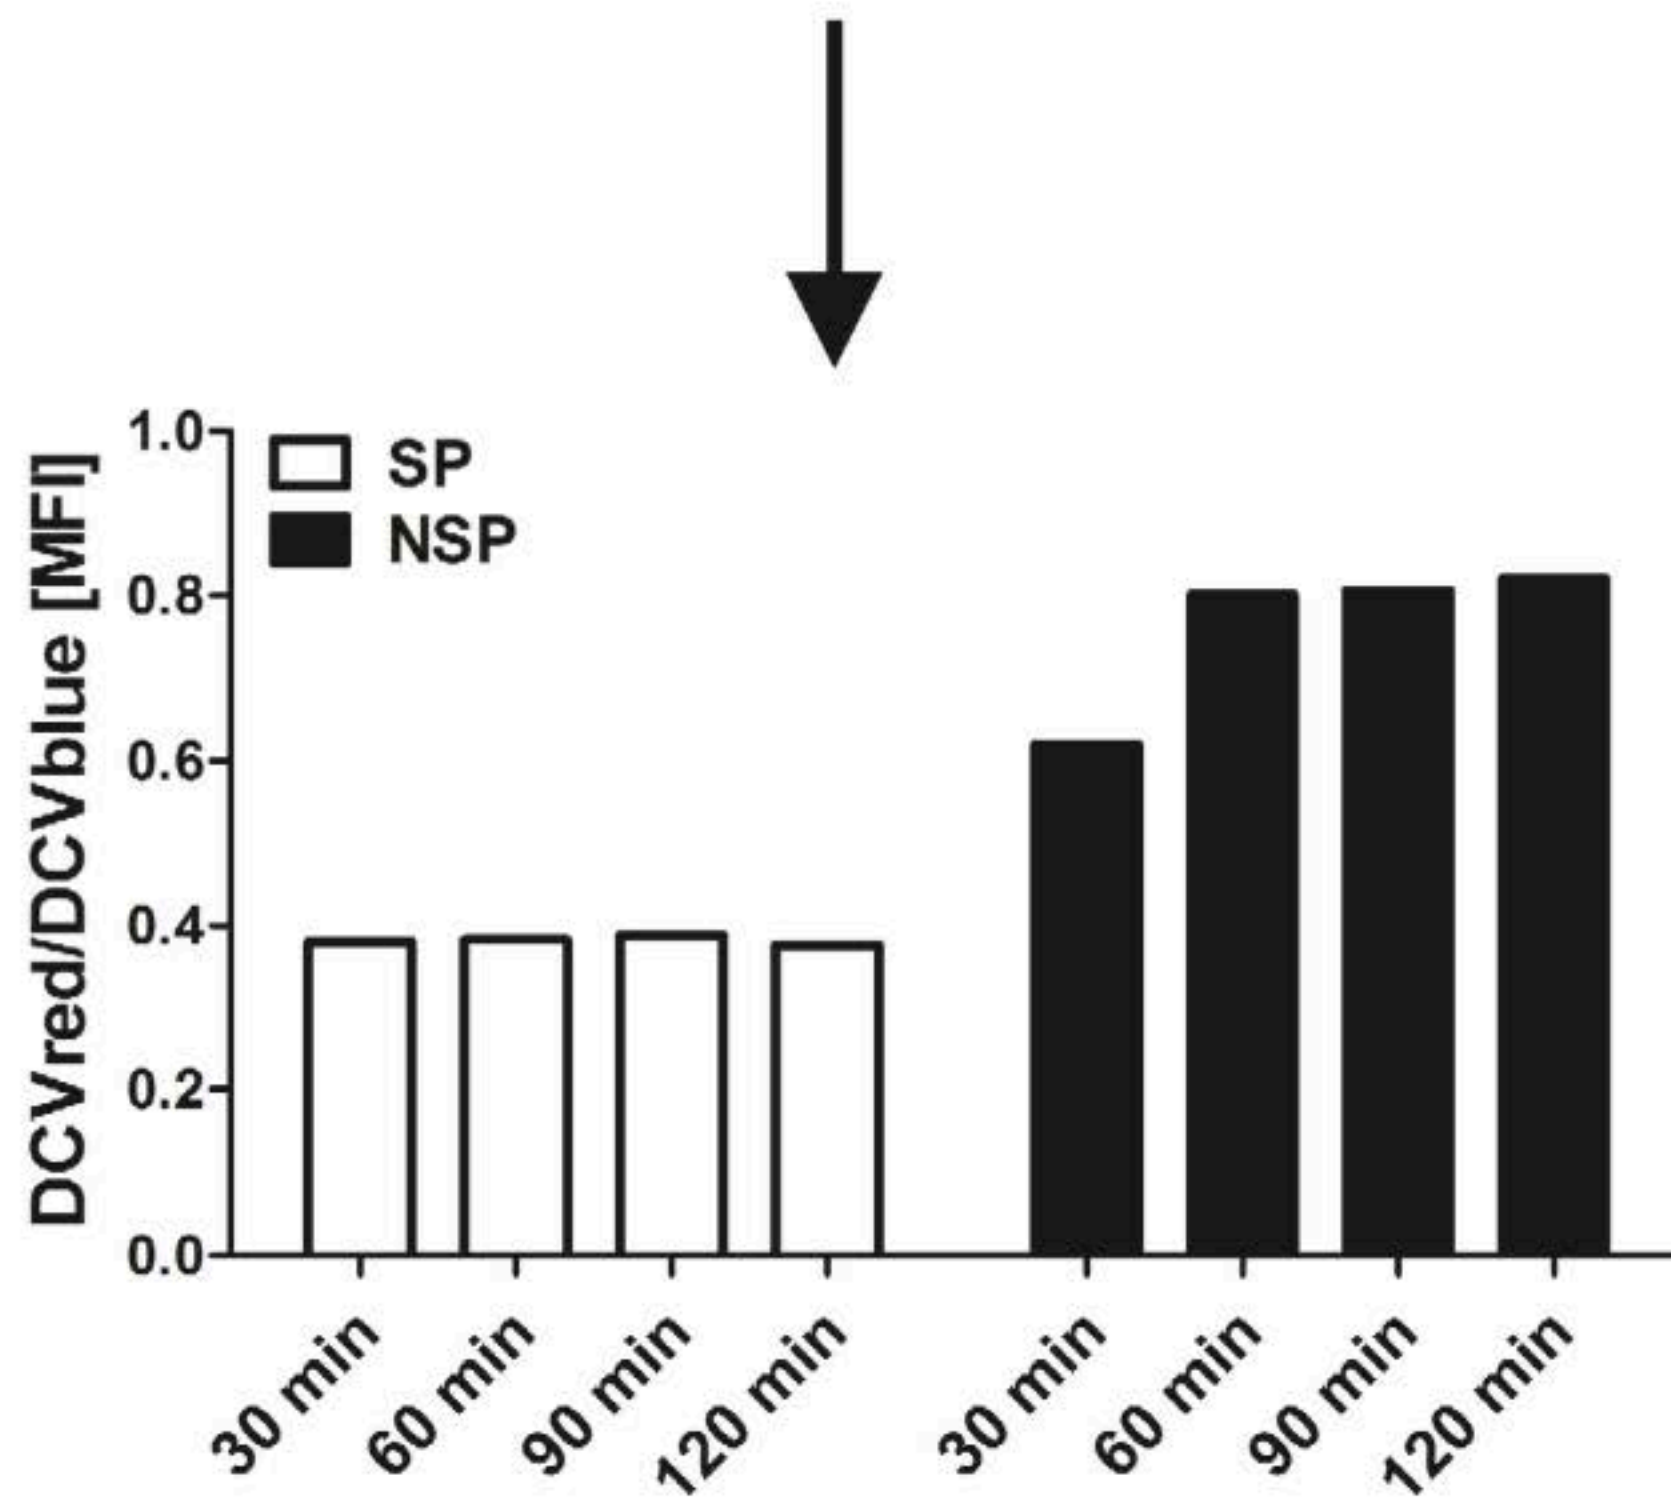

DCV blue (450/50)

no inhibitor

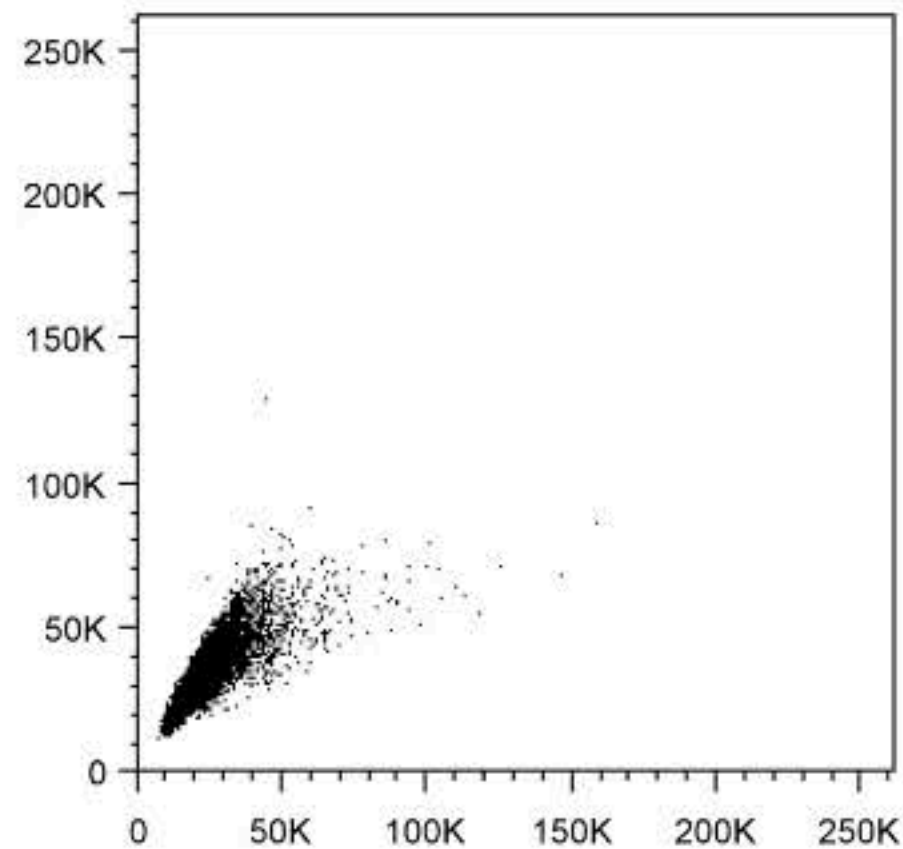

+ verapamil

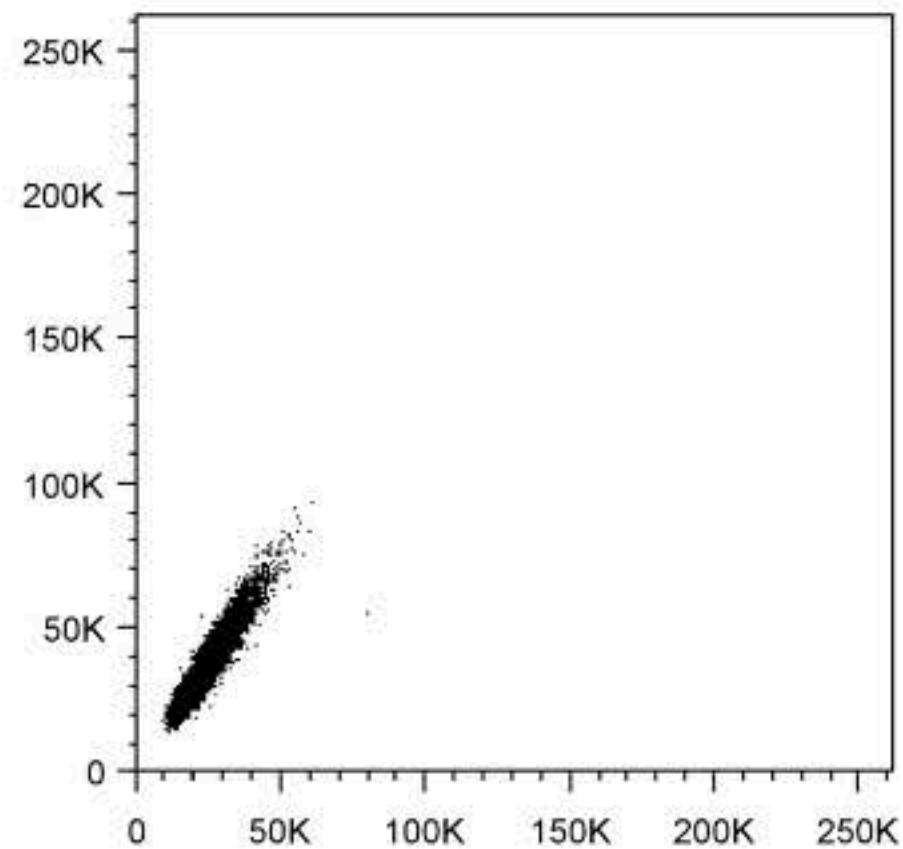

+ fumitremorgin C

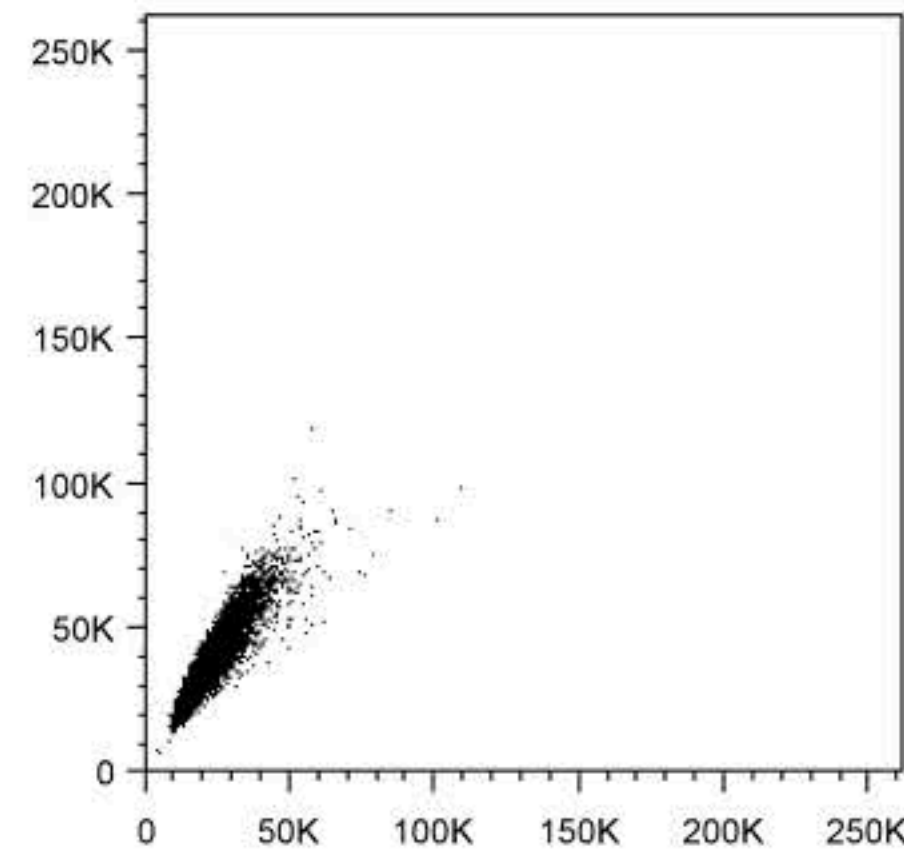

+ reserpine

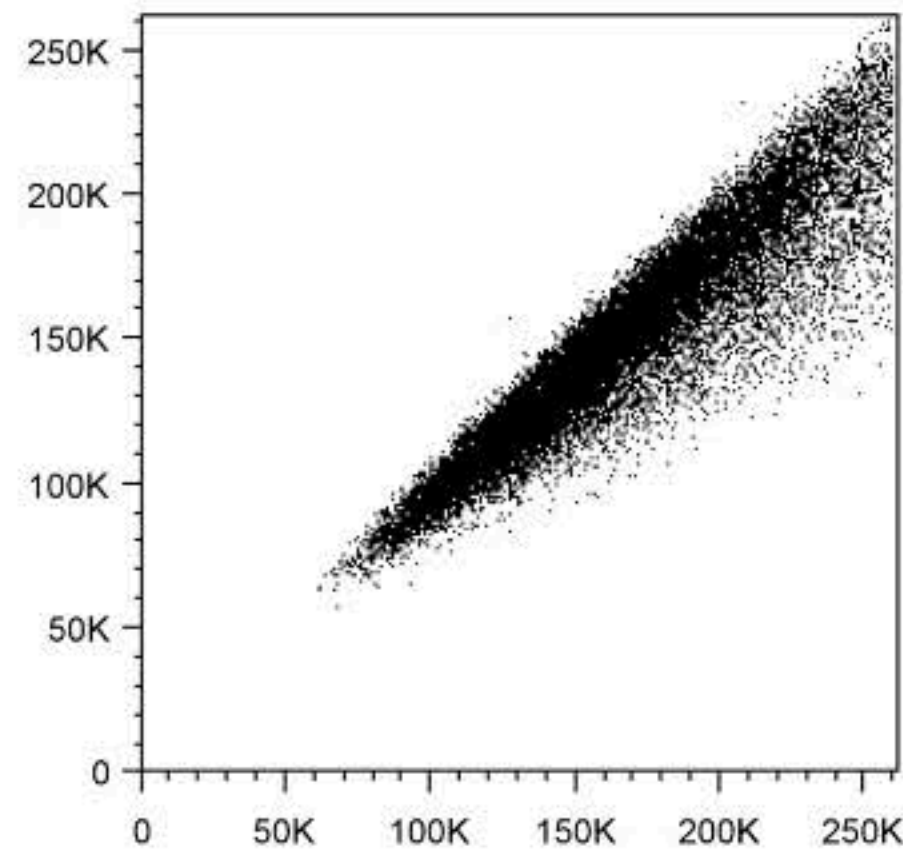

DCV red (510/50)

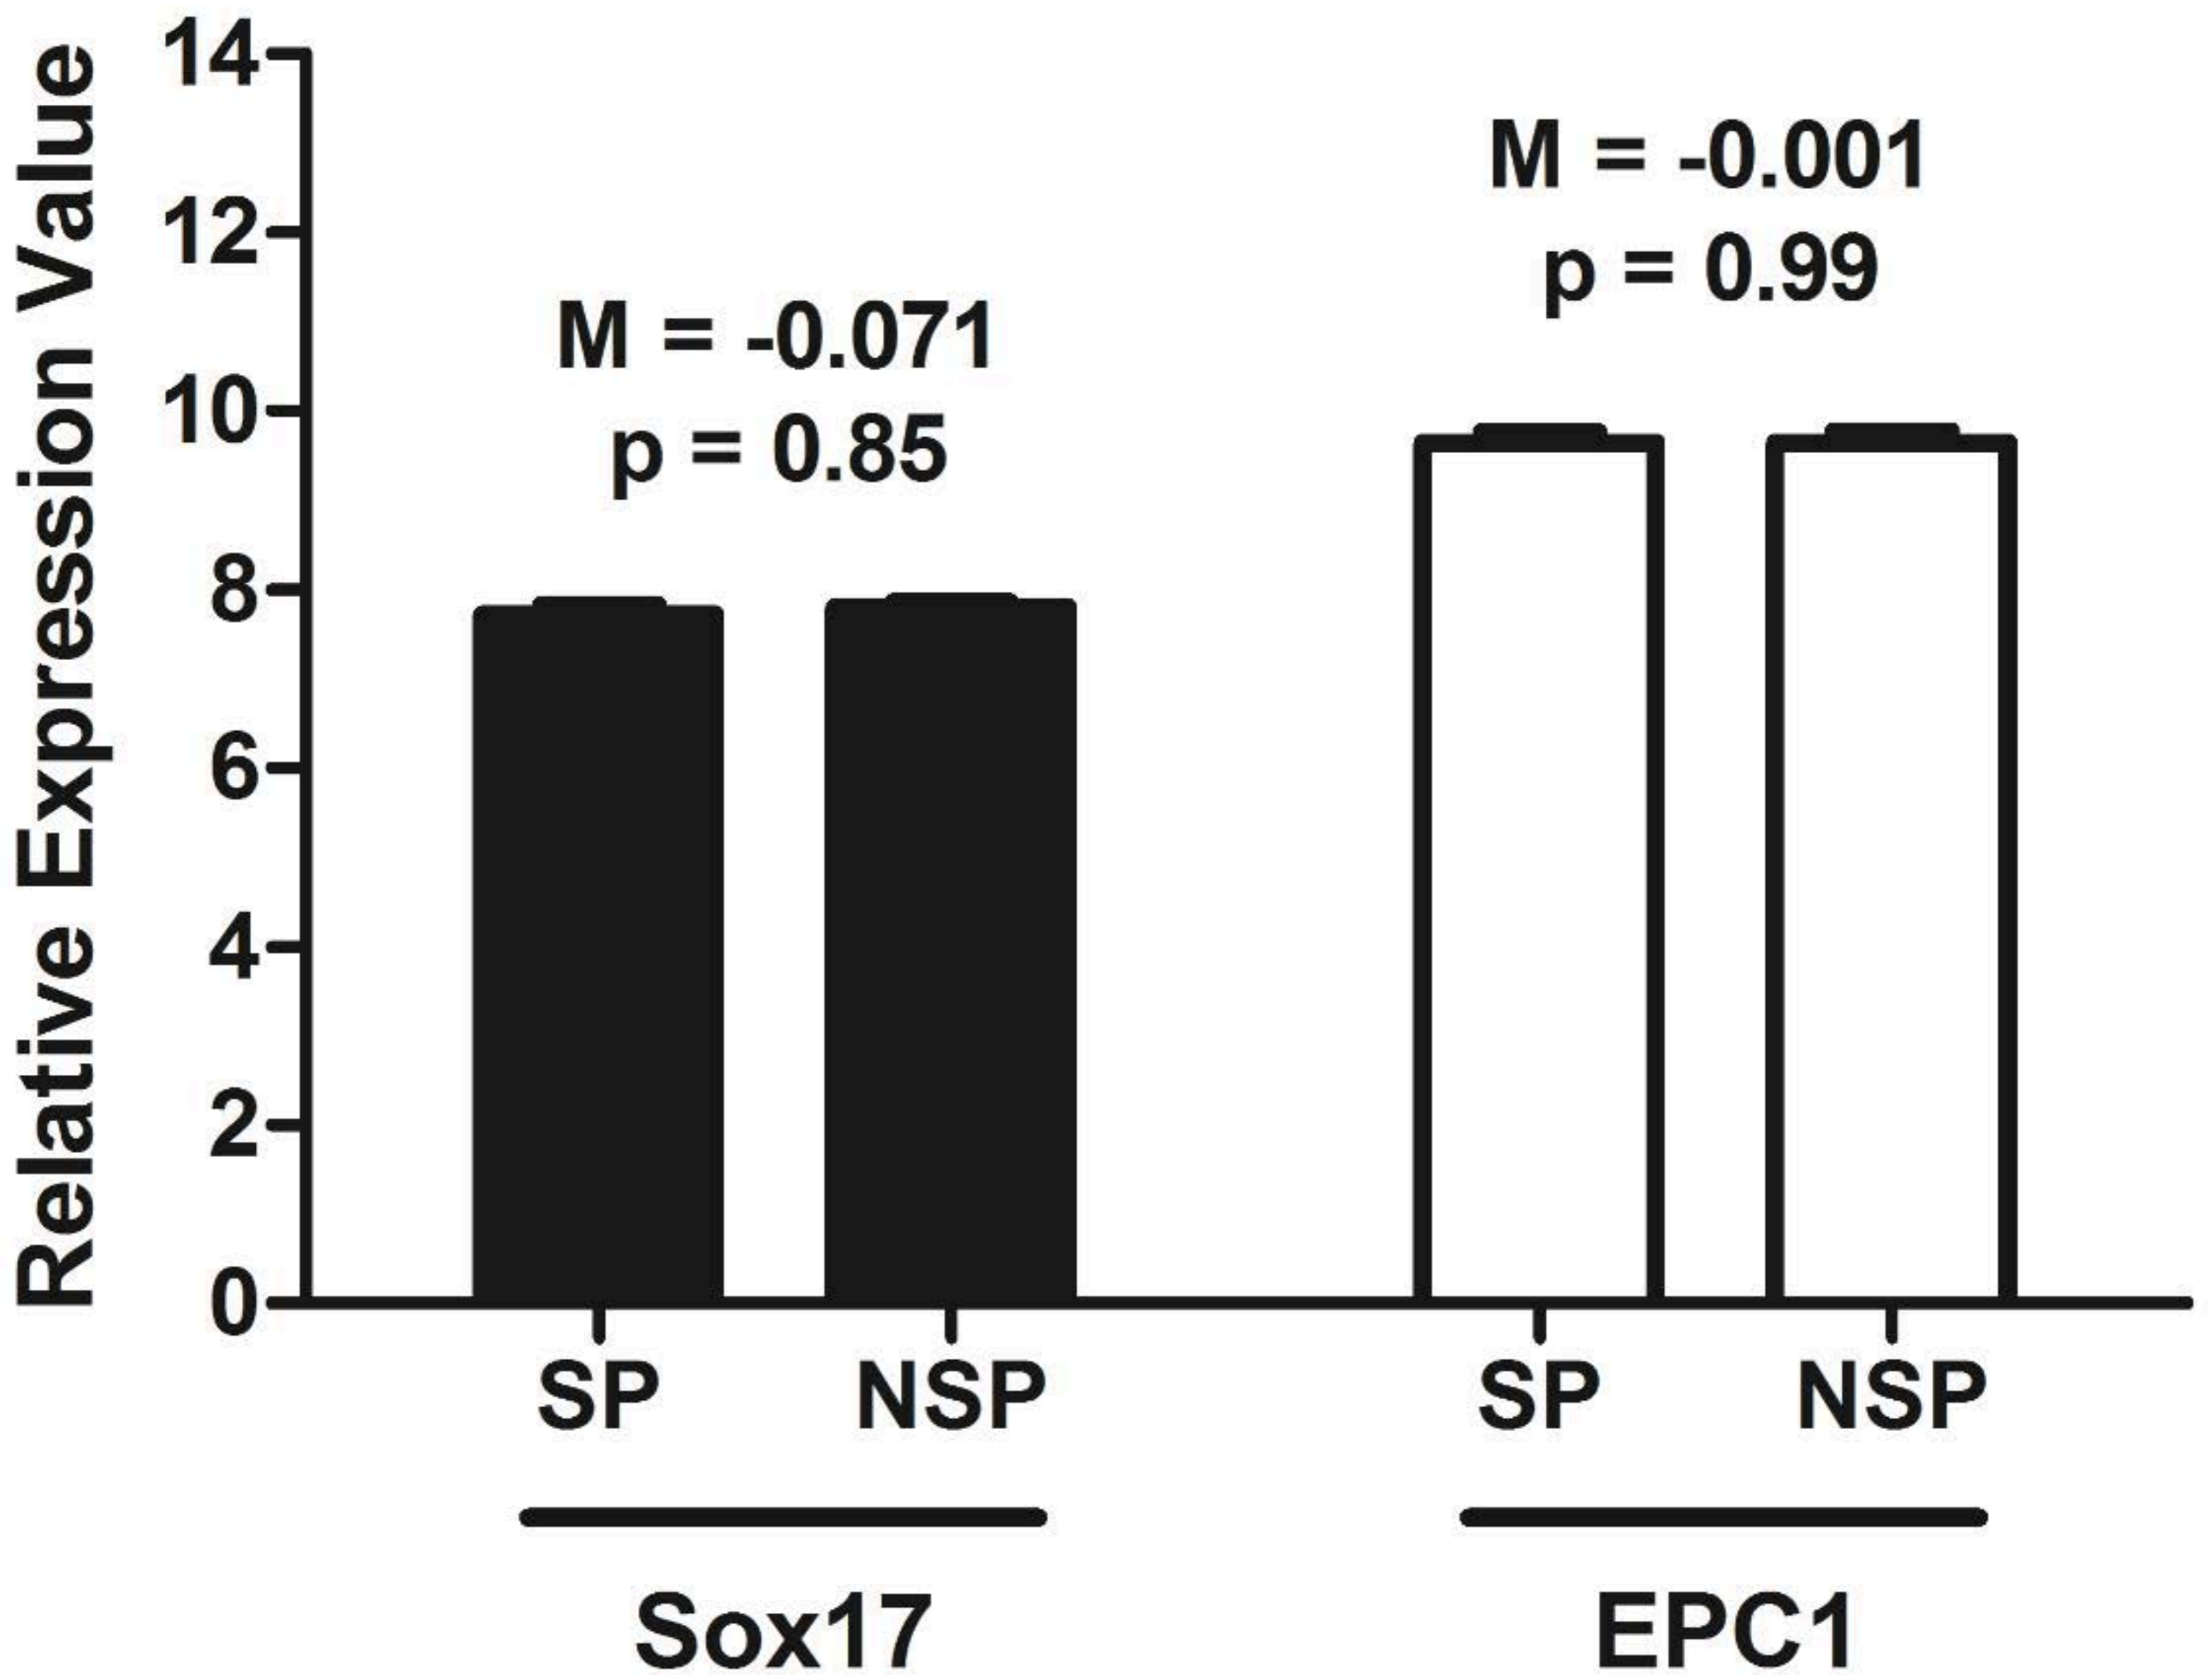

# LSRFortessa

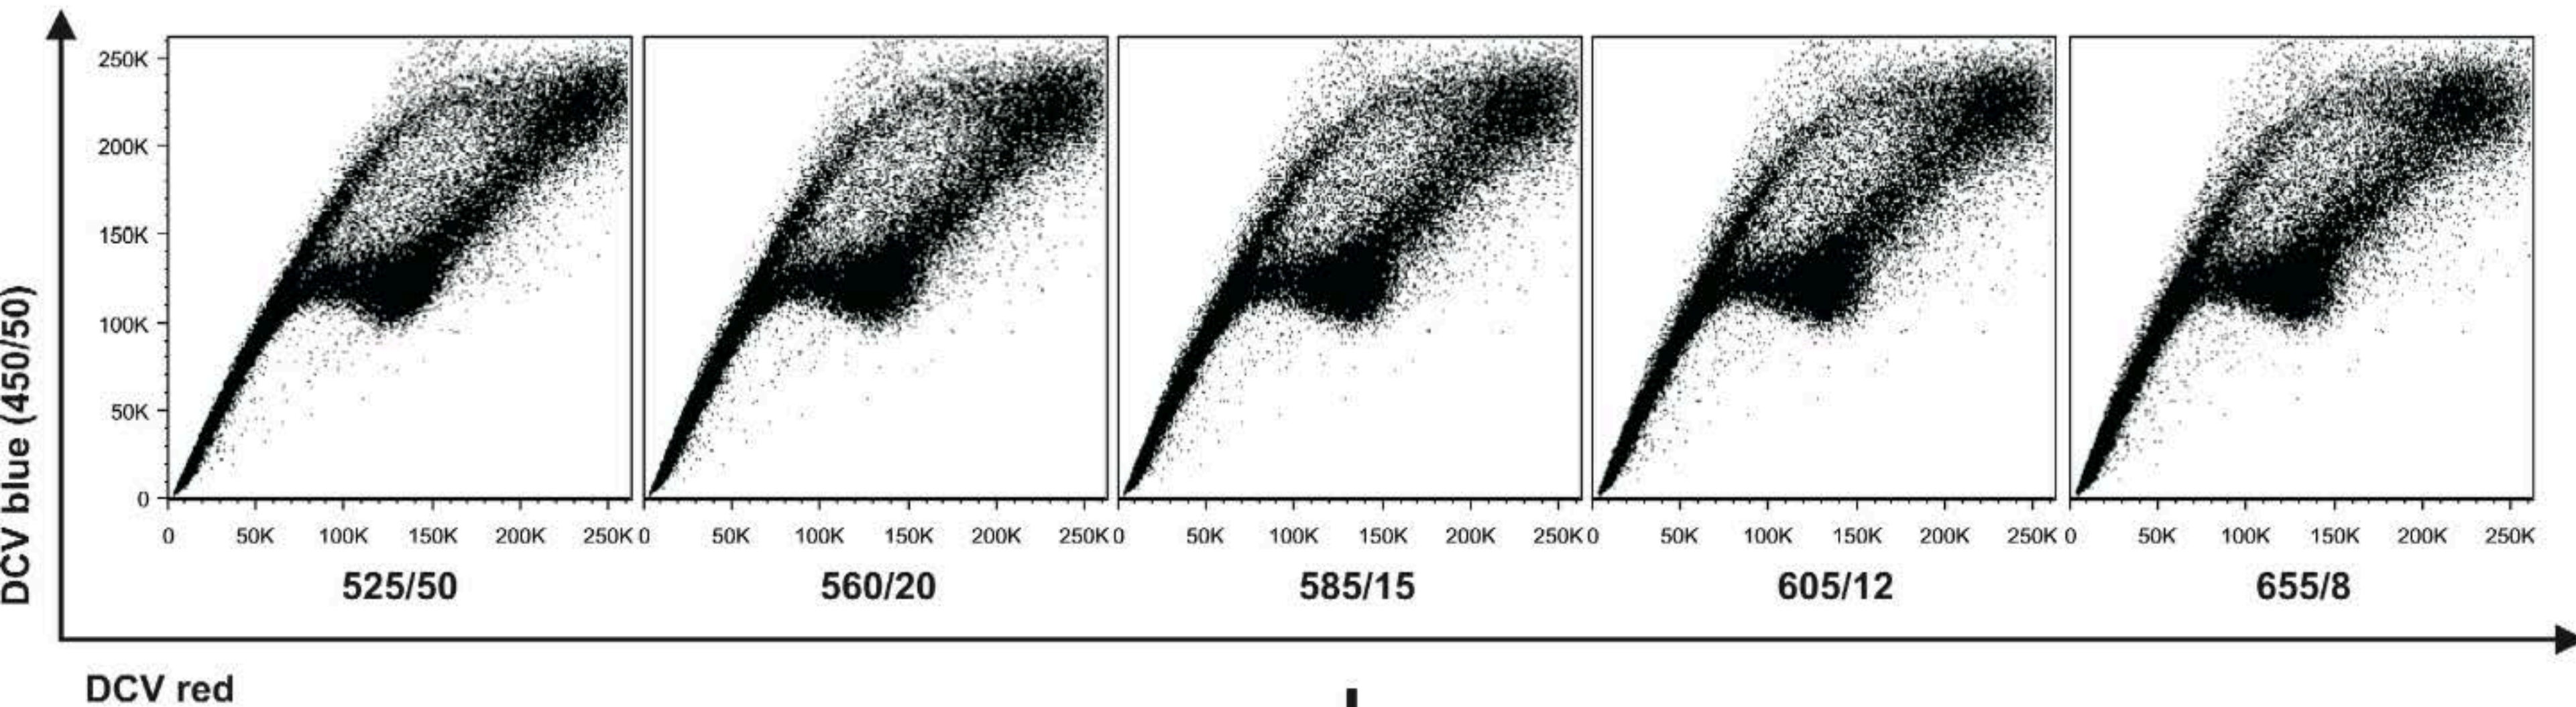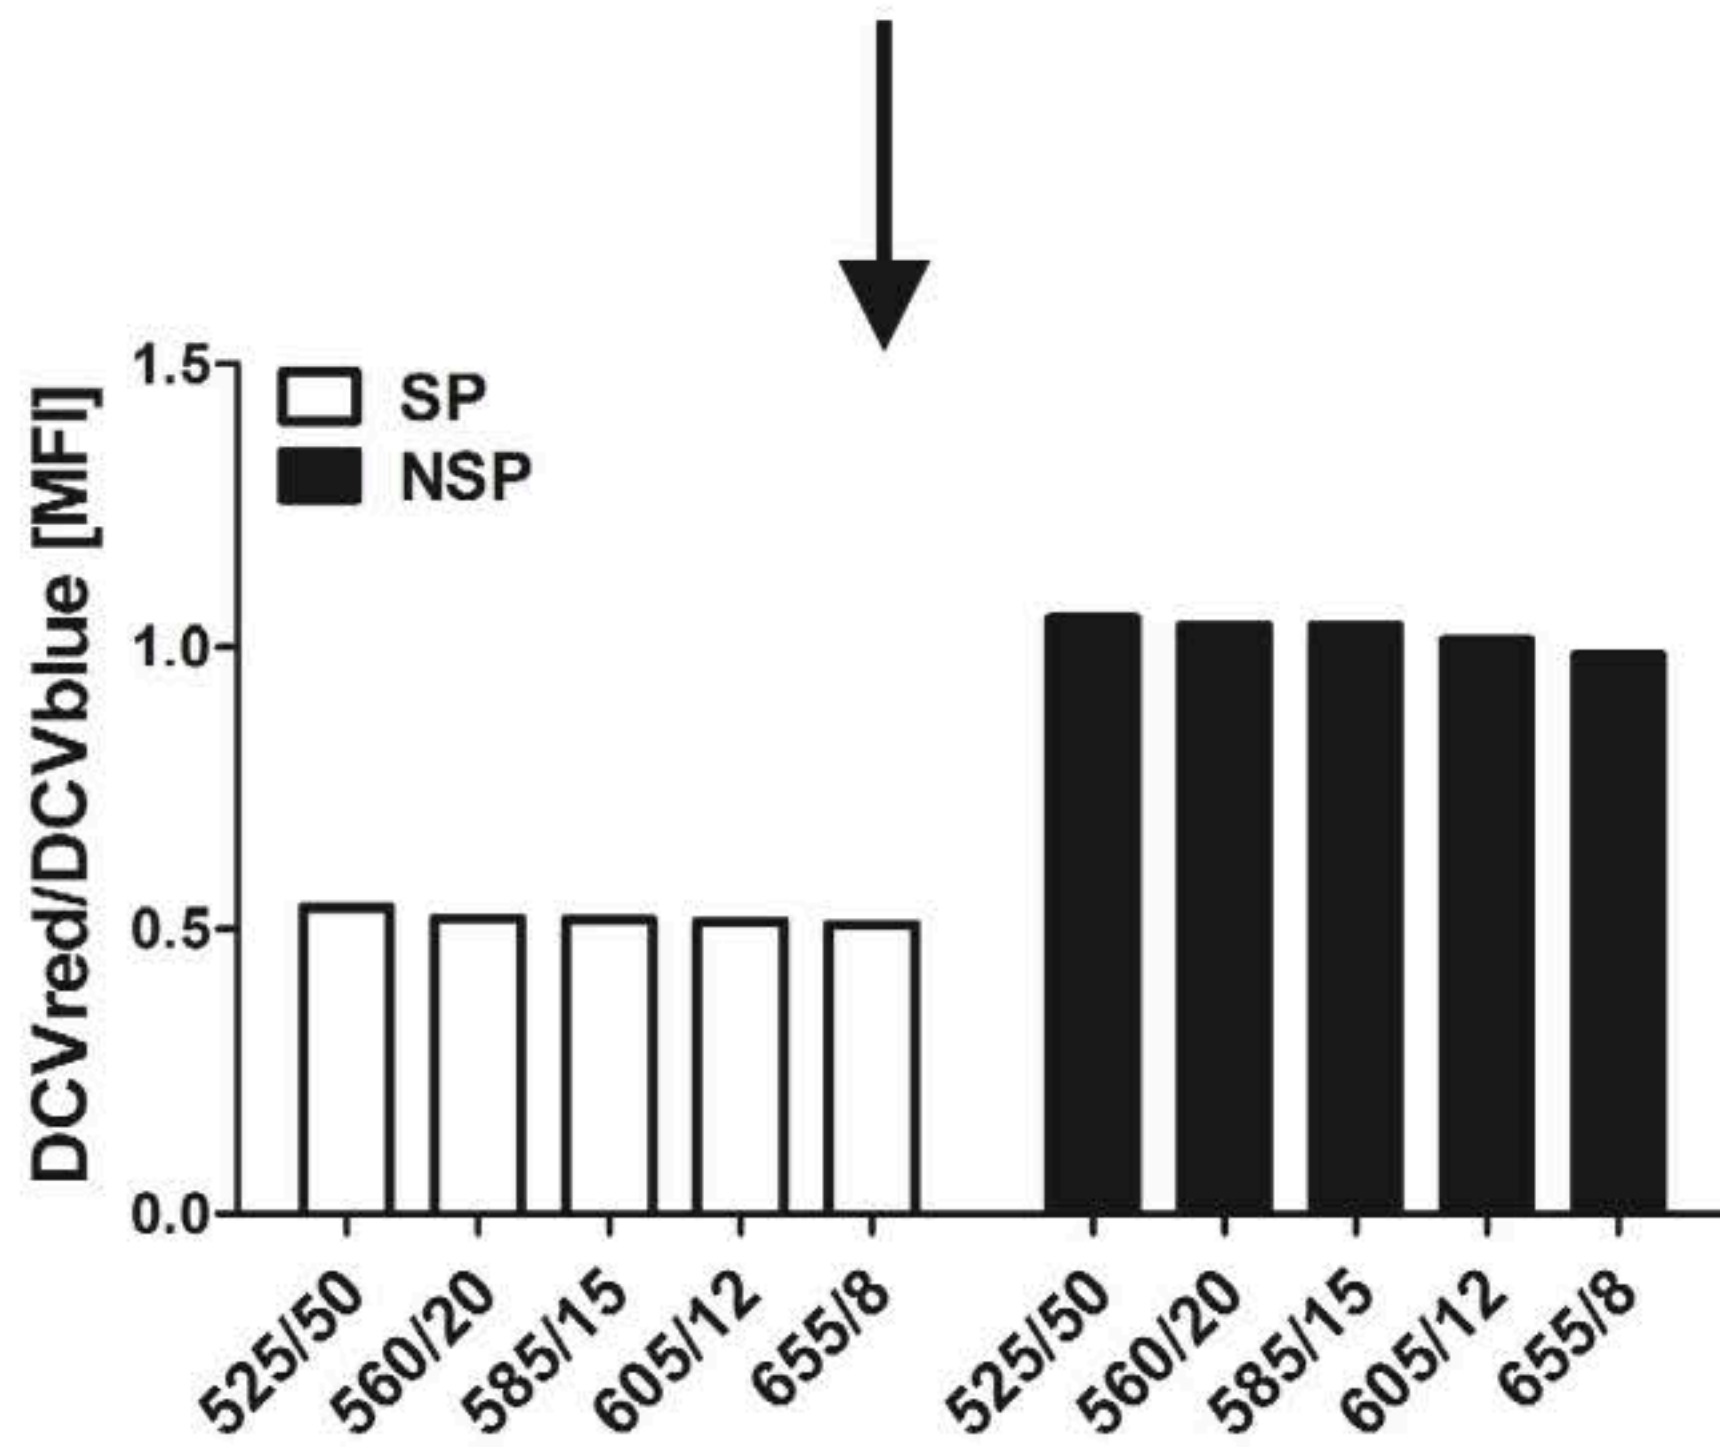

Supplement: 1652389.f1.pdf [file 1652389.f1.pdf]
